# Supplementary material
Source: PubMed Central journal article supplement (PMC1303323)
Supplement: biophysj_85_3_1466__1.pdf [file biophysj_85_3_1466__1.pdf]

## Supporting Information

Title: Thermodynamics of  $\alpha$ - and  $\beta$ -Structure Formation in Proteins.

Authors: A. Irbäck, B. Samuelsson, F. Sjunnesson and S. Wallin.

### Bond lengths (in Å)

|                      |               |                 |            |
|----------------------|---------------|-----------------|------------|
| ----- BACKBONE ----- |               | ----- GLU ----- |            |
| N,CA                 | 1.46          | CB,CG           | 1.52       |
| CA,C                 | 1.52          | CG,CD           | 1.52       |
| C,N                  | 1.33          | CD,OEX          | 1.25 X=1,2 |
| CA,CB                | 1.53          | ----- GLN ----- |            |
| C,O                  | 1.23          | CB,CG           | 1.52       |
| N,H                  | 0.98          | CG,CD           | 1.52       |
| CA,HA                | 1.08          | CD,OE1          | 1.23       |
| CA,2HA               | 1.08 only GLY | CG,NE2          | 1.33       |
| ----- VAL -----      |               | ----- LYS ----- |            |
| CB,CGX               | 1.52 X=1,2    | CB,CG           | 1.52       |
| ----- LEU -----      |               | CG,CD           | 1.52       |
| CB,CG                | 1.53          | CD,CE           | 1.52       |
| CG,CDX               | 1.52 X=1,2    | CE,NZ           | 1.49       |
| ----- ILE -----      |               | ----- ARG ----- |            |
| CB,CG1               | 1.53          | CB,CG           | 1.52       |
| CB,CG2               | 1.53          | CG,CD           | 1.52       |
| CG1,CD1              | 1.52          | CD,NE           | 1.46       |
| ----- SER -----      |               | NE,CZ           | 1.33       |
| CB,OG                | 1.42          | CZ,NHX          | 1.33 X=1,2 |
| ----- THR -----      |               | ----- HIS ----- |            |
| CB,OG1               | 1.43          | CB,CG           | 1.52       |
| CB,CG2               | 1.52          | CG,ND1          | 1.35 *)    |
| ----- CYS -----      |               | ----- PHE ----- |            |
| CB,SD                | 1.81          | CB,CG           | 1.52       |
| ----- MET -----      |               | CG,CD1          | 1.39 *)    |
| CB,CG                | 1.52          | ----- TYR ----- |            |
| CG,SD                | 1.81          | CB,CG           | 1.51       |
| SD,CE                | 1.79          | CG,CD1          | 1.39 *)    |
| ----- PRO -----      |               | CZ,OH           | 1.38       |
| CB,CG                | 1.51          | ----- TRP ----- |            |
| CG,CD                | 1.51          | CB,CG           | 1.50       |
| ----- ASP -----      |               | CG,CD1          | 1.39 *)    |
| CB,CG                | 1.52          |                 |            |
| CG,ODX               | 1.25 X=1,2    |                 |            |
| ----- ASN -----      |               |                 |            |
| CB,CG                | 1.52          |                 |            |
| CG,OD1               | 1.23          |                 |            |
| CG,ND2               | 1.33          |                 |            |

All bonds between an H and a side-chain atom have length 1.00 Å.

\*) Rings are regular pentagons/hexagons.

**Bond angles (in degrees)**

|                      |       |                   |                 |       |           |
|----------------------|-------|-------------------|-----------------|-------|-----------|
| ----- BACKBONE ----- |       |                   | ----- CYS ----- |       |           |
| N, CA, C             | 111.0 |                   | CA, CB, SG      | 113.4 |           |
| CA, C, N             | 116.6 |                   | CA, CB, XHB     | 108.1 | X=1, 2    |
| C, N, CA             | 121.7 |                   | CB, SG, HG      | 108.0 |           |
| N, CA, CB            | 110.0 |                   | ----- MET ----- |       |           |
| CA, C, O             | 121.7 |                   | CA, CB, CG      | 113.5 |           |
| C, N, H              | 119.2 |                   | CB, CG, SD      | 111.9 |           |
| N, CA, HA            | 109.0 |                   | CG, SD, CE      | 100.5 |           |
| N, CA, 2HA           | 109.0 | only GLY          | CA, CB, XHB     | 108.1 | X=1, 2    |
| ----- ALA -----      |       |                   | CB, CG, XHG     | 108.7 | X=1, 2    |
| CA, CB, XHB          | 109.5 | X=1, 2, 3         | SD, CE, XHE     | 109.5 | X=1, 2, 3 |
| ----- VAL -----      |       |                   | ----- PRO ----- |       |           |
| CA, CB, CGX          | 110.7 | X=1, 2            | CA, CB, CG      | 103.3 |           |
| CA, CB, HB           | 109.1 |                   | CB, CG, CD      | 110.8 |           |
| CB, CGY, XHGY        | 109.5 | X=1, 2, 3; Y=1, 2 | CA, CB, XHB     | 111.6 | X=1, 2    |
| ----- LEU -----      |       |                   | CB, CG, XHG     | 109.0 | X=1, 2    |
| CA, CB, CG           | 117.1 |                   | CG, CD, XHD     | 110.7 | X=1, 2    |
| CB, CG, CDX          | 110.1 | X=1, 2            | ----- ASP ----- |       |           |
| CA, CB, XHB          | 107.0 | X=1, 2            | CA, CB, CG      | 113.2 |           |
| CB, CG, HG           | 109.3 |                   | CB, CG, ODX     | 118.6 | X=1, 2    |
| CG, CDY, XHDY        | 109.5 | X=1, 2, 3; Y=1, 2 | CA, CB, XHB     | 108.2 | X=1, 2    |
| ----- ILE -----      |       |                   | ----- ASN ----- |       |           |
| CA, CB, CG1          | 110.4 |                   | CA, CB, CG      | 112.6 |           |
| CA, CB, CG2          | 110.4 |                   | CB, CG, OD1     | 120.9 |           |
| CB, CG1, CD1         | 113.6 |                   | CB, CG, ND2     | 117.0 |           |
| CA, CB, HB           | 109.2 |                   | CA, CB, XHB     | 108.4 | X=1, 2    |
| CB, CG1, XHG1        | 108.1 | X=1, 2            | CG, ND2, XHD2   | 120.0 | X=1, 2    |
| CB, CG2, XHG2        | 109.5 | X=1, 2, 3         | ----- GLU ----- |       |           |
| CG1, CD1, XHD1       | 109.5 | X=1, 2, 3         | CA, CB, CG      | 114.1 |           |
| ----- SER -----      |       |                   | CB, CG, CD      | 113.2 |           |
| CA, CB, OG           | 110.6 |                   | CG, CD, OEX     | 118.5 | X=1, 2    |
| CA, CB, XHB          | 109.1 | X=1, 2            | CA, CB, XHB     | 108.0 | X=1, 2    |
| CB, OG, HG           | 108.0 |                   | CB, CG, XHG     | 108.2 | X=1, 2    |
| ----- THR -----      |       |                   | ----- GLN ----- |       |           |
| CA, CB, OG1          | 108.6 |                   | CA, CB, CG      | 113.7 |           |
| CA, CB, CG2          | 111.5 |                   | CB, CG, CD      | 112.6 |           |
| CA, CB, HB           | 109.3 |                   | CG, CD, OE1     | 121.0 |           |
| CB, OG1, HG1         | 108.0 |                   | CG, CD, NE2     | 116.9 |           |
| CB, CG2, XHG2        | 109.5 | X=1, 2, 3         | CA, CB, XHB     | 108.1 | X=1, 2    |
|                      |       |                   | CB, CG, XHG     | 108.4 | X=1, 2    |
|                      |       |                   | CD, NE2, XHE2   | 120.0 | X=1, 2    |

Bond angles cont.

|                 |       |                |
|-----------------|-------|----------------|
| ----- LYS ----- |       |                |
| CA, CB, CG      | 113.8 |                |
| CB, CG, CD      | 111.6 |                |
| CG, CD, CE      | 111.6 |                |
| CD, CE, NZ      | 111.6 |                |
| CA, CB, XHB     | 108.1 | X=1, 2         |
| CB, CG, XHG     | 108.8 | X=1, 2         |
| CG, CD, XHD     | 108.8 | X=1, 2         |
| CD, CE, XHE     | 108.8 | X=1, 2         |
| CE, NZ, XHZ     | 109.5 | X=1, 2, 3      |
| ----- ARG ----- |       |                |
| CA, CB, CG      | 113.7 |                |
| CB, CG, CD      | 111.5 |                |
| CG, CD, NE      | 111.5 |                |
| CD, NE, CZ      | 124.4 |                |
| NE, CZ, NHX     | 120.0 | X=1, 2         |
| CA, CB, XHB     | 108.1 | X=1, 2         |
| CB, CG, XHG     | 108.8 | X=1, 2         |
| CG, CD, XHD     | 108.8 | X=1, 2         |
| CZ, NE, HE      | 120.0 |                |
| CZ, NHY, XHHY   | 120.0 | X=1, 2; Y=1, 2 |
| ----- HIS ----- |       |                |
| CA, CB, CG      | 113.2 |                |
| CB, CG, ND1     | 126.0 |                |
| CA, CB, XHB     | 108.2 | X=1, 2         |
| ----- PHE ----- |       |                |
| CA, CB, CG      | 113.7 |                |
| CB, CG, CD1     | 120.0 |                |
| CA, CB, XHB     | 108.1 | X=1, 2         |
| ----- TYR ----- |       |                |
| CA, CB, CG      | 113.6 |                |
| CB, CG, CD1     | 120.0 |                |
| CE1, CZ, OH     | 120.0 |                |
| CA, CB, XHB     | 108.1 | X=1, 2         |
| CZ, OH, HH      | 108.0 |                |
| ----- TRP ----- |       |                |
| CA, CB, CG      | 113.8 |                |
| CB, CG, CD1     | 126.0 |                |
| CA, CB, XHB     | 108.1 | X=1, 2         |

The rings of HIS, PHE, TYR and TRP are regular pentagons/hexagons with hydrogens pointing in the radial direction.

Torsion angles (in degrees)

|                             |        |          |
|-----------------------------|--------|----------|
| ----- BACKBONE -----        |        |          |
| CA, C, N, CA                | 180.0  |          |
| C, N, CA, C - C, N, CA, CB  | 120.9  |          |
| C, N, CA, C - C, N, CA, HA  | -118.7 |          |
| C, N, CA, C - C, N, CA, 2HA | 118.7  | only GLY |

For side-chain branch points, we assume exact 2-fold or 3-fold torsional symmetry. The rings of PRO, HIS, PHE, TYR and TRP as well as the atom group NE, CZ, NH1 and NH2 of ARG are planar.

Number of side-chain DOFs ( $\chi_i$ )

|     |   |
|-----|---|
| GLY | 0 |
| ALA | 1 |
| VAL | 3 |
| LEU | 4 |
| ILE | 4 |
| SER | 2 |
| THR | 3 |
| CYS | 2 |
| MET | 4 |
| PRO | 0 |
| ASP | 2 |
| ASN | 3 |
| GLU | 3 |
| GLN | 4 |
| LYS | 5 |
| ARG | 4 |
| HIS | 2 |
| PHE | 2 |
| TYR | 3 |
| TRP | 2 |
